# Supplementary material for: Dual-targeting sulfamethoxazole derivatives overcome multidrug resistance in ESKAPE pathogens by inhibiting quorum sensing and efflux pumps
Source: Royal Society of Chemistry journal article supplement (doi:10.1039/d5ra08024j), 2026-01-01
Supplement: d5ra08024j1.pdf [file d5ra08024j1.pdf]

## SUPPORTING INFORMATION

# **Dual-Targeting Sulfamethoxazole Derivatives Overcome Multidrug Resistance in ESKAPE Pathogens by Inhibiting Quorum Sensing and Efflux Pumps**

Benedicta Yayra Adzah<sup>1</sup>, Prince Danan Biniyam<sup>1</sup>, Victoria Ohene-Adu<sup>1</sup>, Michael Osei<sup>1</sup>, Kwabena Adu-Adjei<sup>1</sup>, Victoria Elmes<sup>2</sup>, Iain Goodall<sup>2</sup>, Vuvor Faustina<sup>1</sup>, , Yvonne Dogbeda Agboyibor<sup>1</sup>, Patrick Gyan<sup>1</sup>, Paul Quansah<sup>1</sup>, Cyril Makafui Amengor<sup>3</sup>, Joshua Boateng<sup>2</sup>, En Zhang<sup>4</sup>, Maxwell Ampomah-Wireko<sup>5</sup>, Ernest Oyeh<sup>6</sup>, Cedric Dzidzor Kodjo Amengor<sup>1\*</sup>,

<sup>1</sup> Department of Pharmaceutical Chemistry, Drug Discovery Unit, School of Pharmacy, University of Health and Allied Sciences, Ho, Ghana; <sup>2</sup> School of Science, University of Greenwich, United Kingdom. <sup>3</sup>Department of Mathematics, University of Ghana, Legon-Ghana.

<sup>4</sup>School of Pharmaceutical Sciences, Key Laboratory of Advanced Pharmaceutical Technology, Ministry of Education of China, Zhengzhou University, Zhengzhou 450001, PR China

<sup>5</sup>School of Pharmaceutical Sciences, Key Laboratory of Advanced Pharmaceutical Technology, Ministry of Education of China, Zhengzhou University, Zhengzhou 450001, PR China

<sup>6</sup>Department Of Nursing, Faculty Of Science, Methodist University Ghana, Ghana.

Corresponding Author:

Current Address: Department of Pharmaceutical Chemistry, School of Pharmacy, University of Health and Allied Sciences, Ho. [camengor@uhas.edu.gh](mailto:camengor@uhas.edu.gh). Contact: +233246456764.

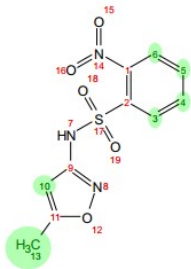

**Figure SM2:**  $^{13}\text{C}$  NMR spectrum of compound SMX 001

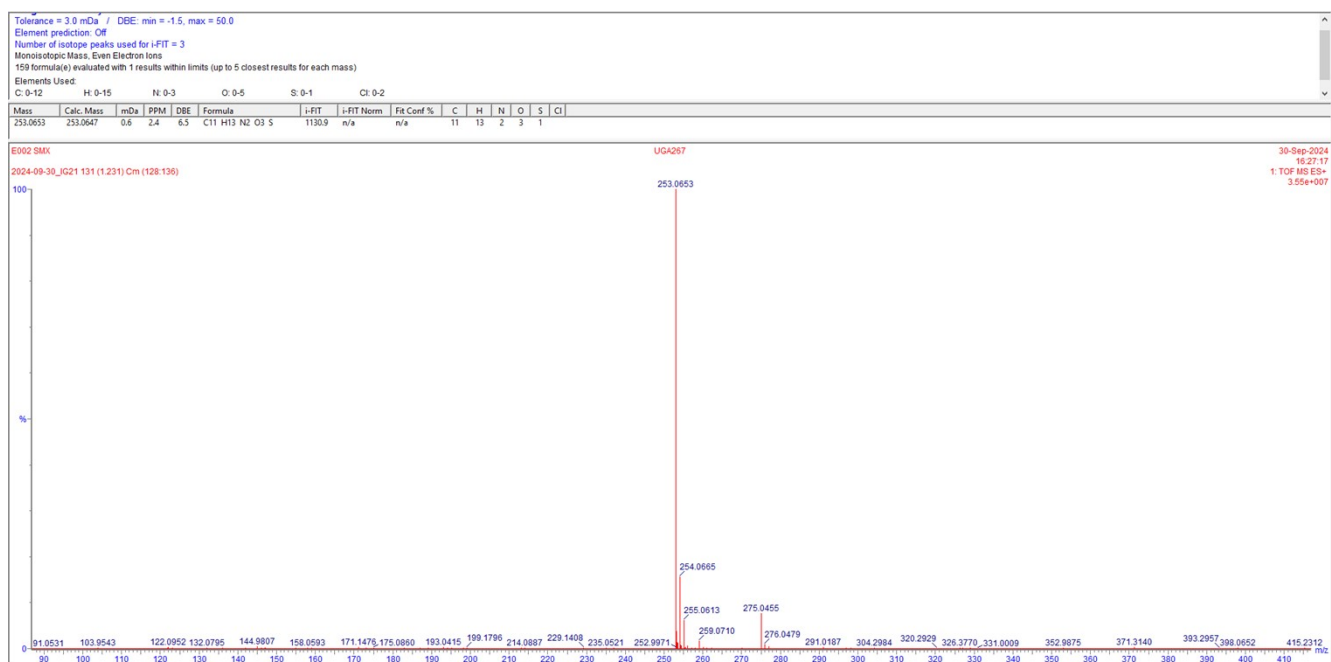

**Figure SM3:** HRMS of compound SMX 001

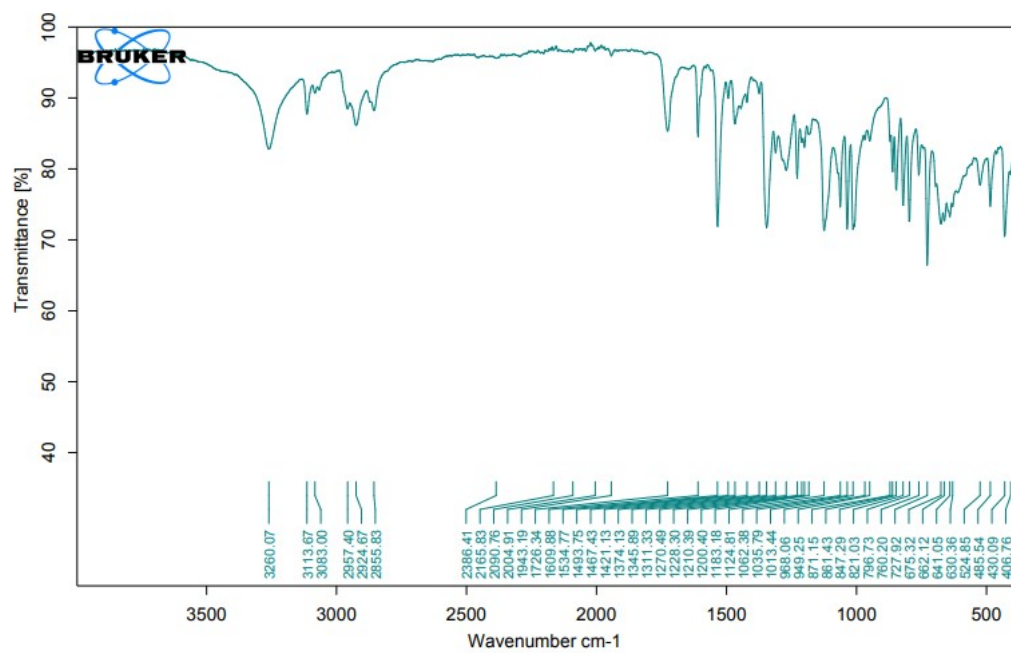

**Figure SM4:** FTIR spectrum of compound SMX 001

EXP007 SMX  
single\_pulse

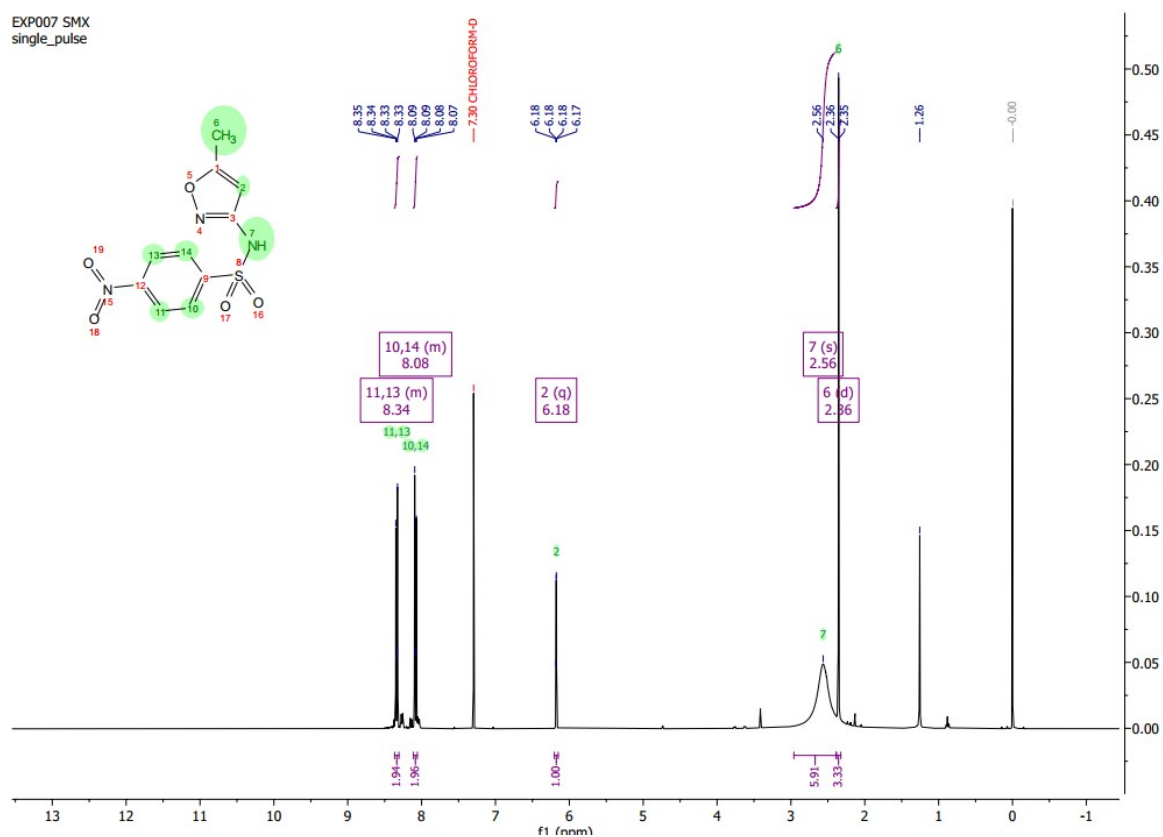

**Figure SM5:**  $^1\text{H}$  NMR spectrum of compound SMX 003

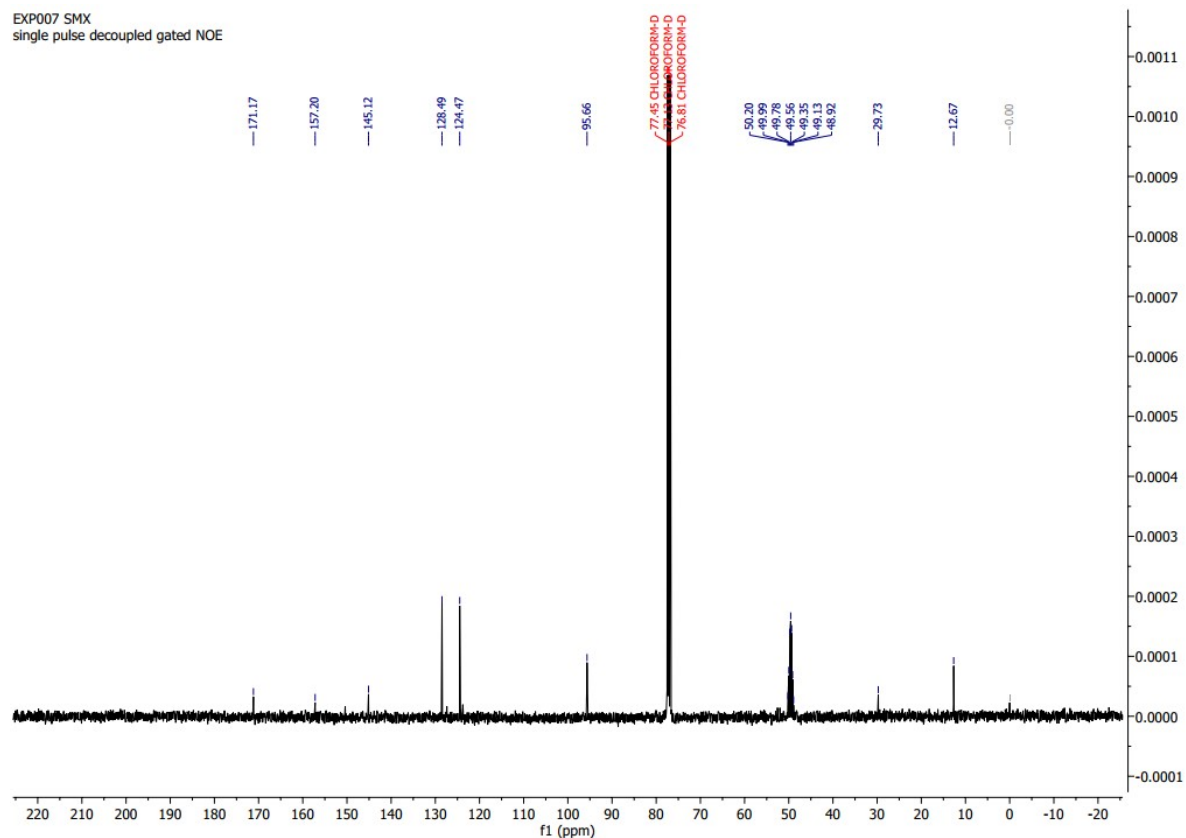

**Figure SM6:**  $^{13}\text{C}$  NMR spectrum of compound SMX 003

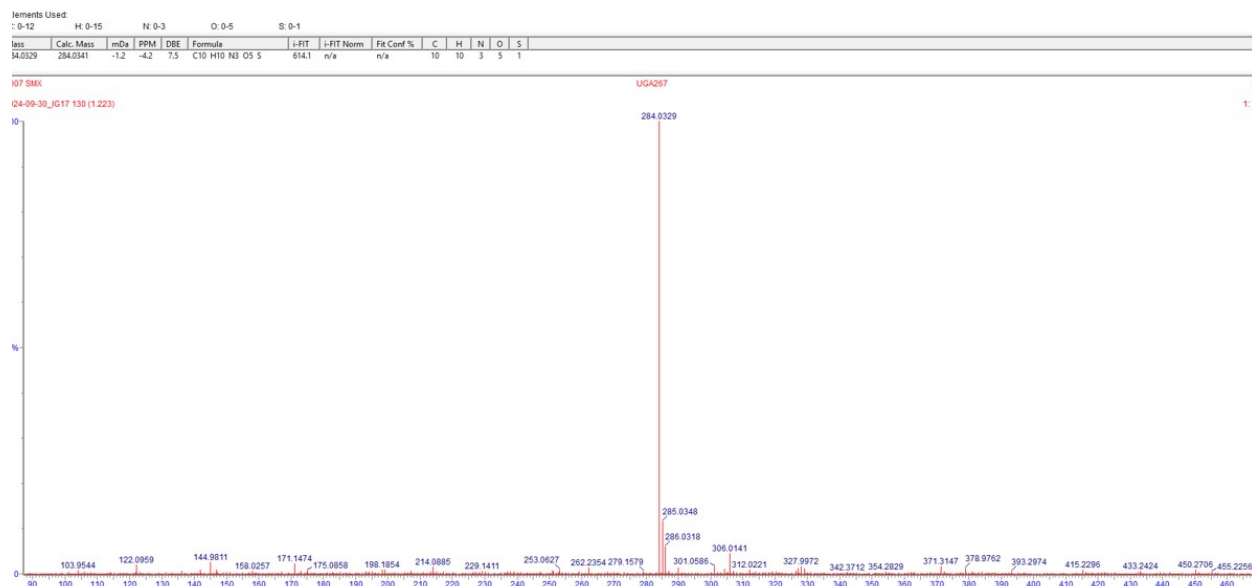

**Figure SM7:** HRMS of compound SMX 003

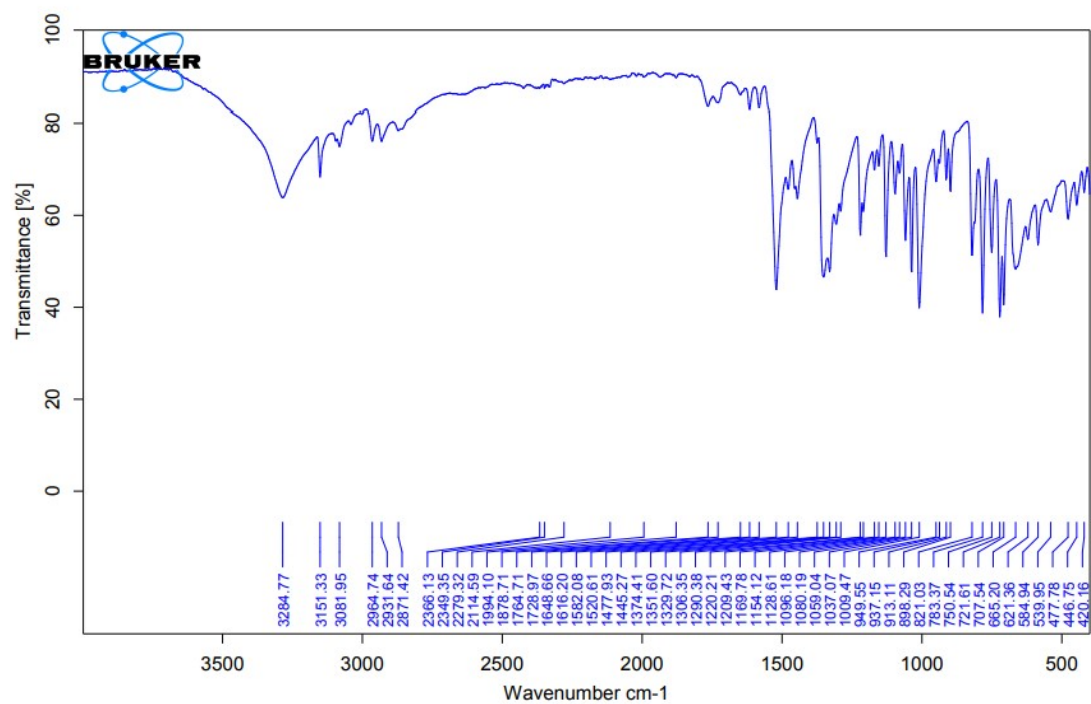

**Figure SM8:** FTIR spectrum of compound SMX 003

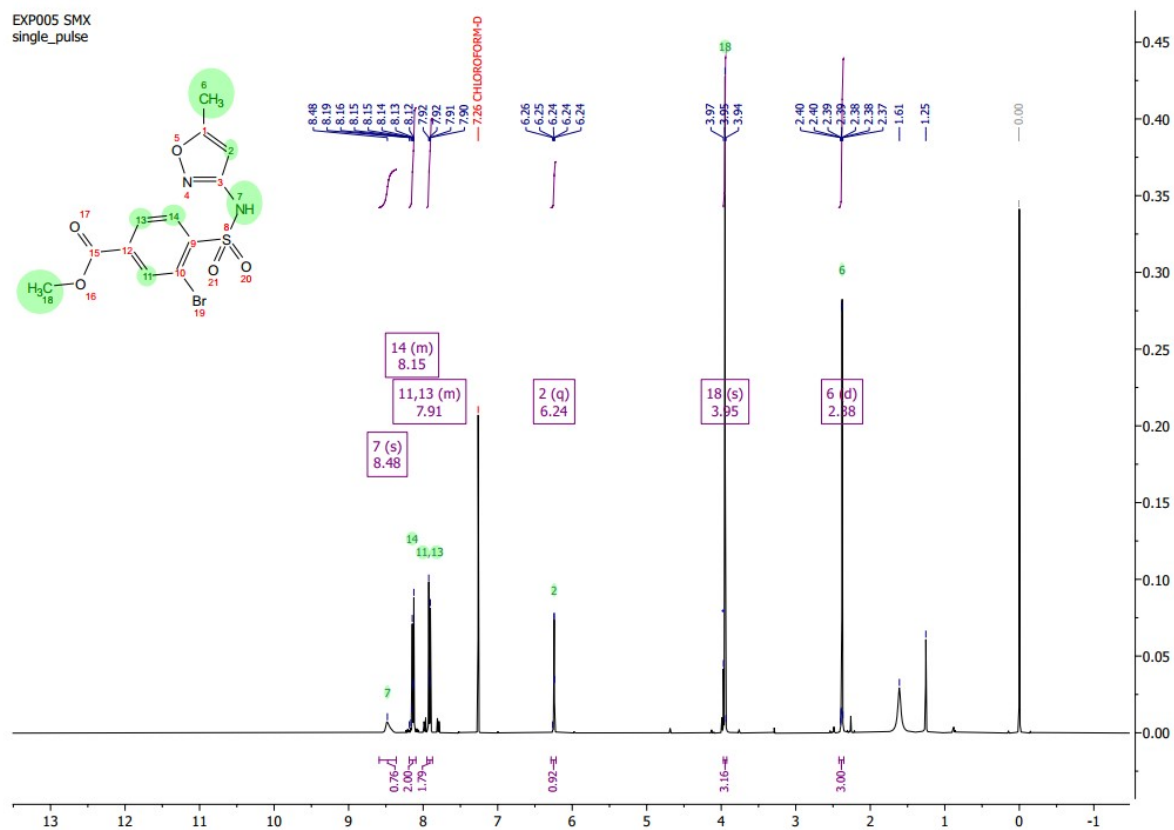

**Figure SM9:** <sup>1</sup>H NMR spectrum of compound SMX 015

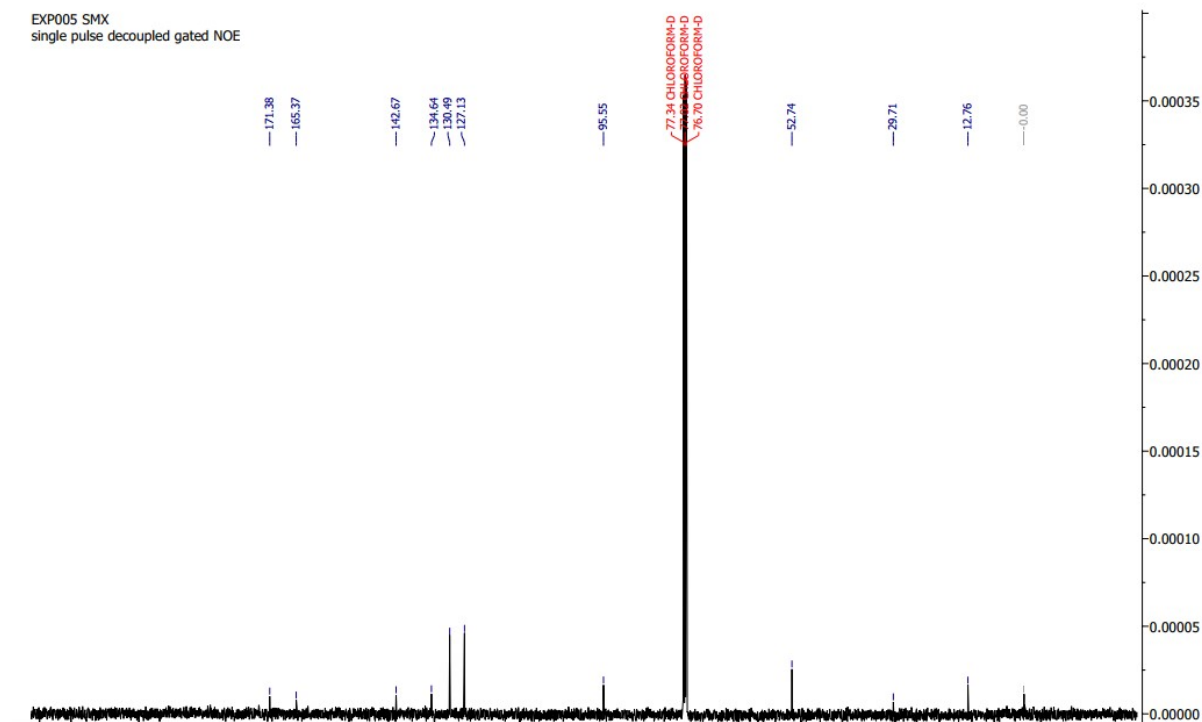

**Figure SM10:** <sup>13</sup>C NMR spectrum of compound SMX 015

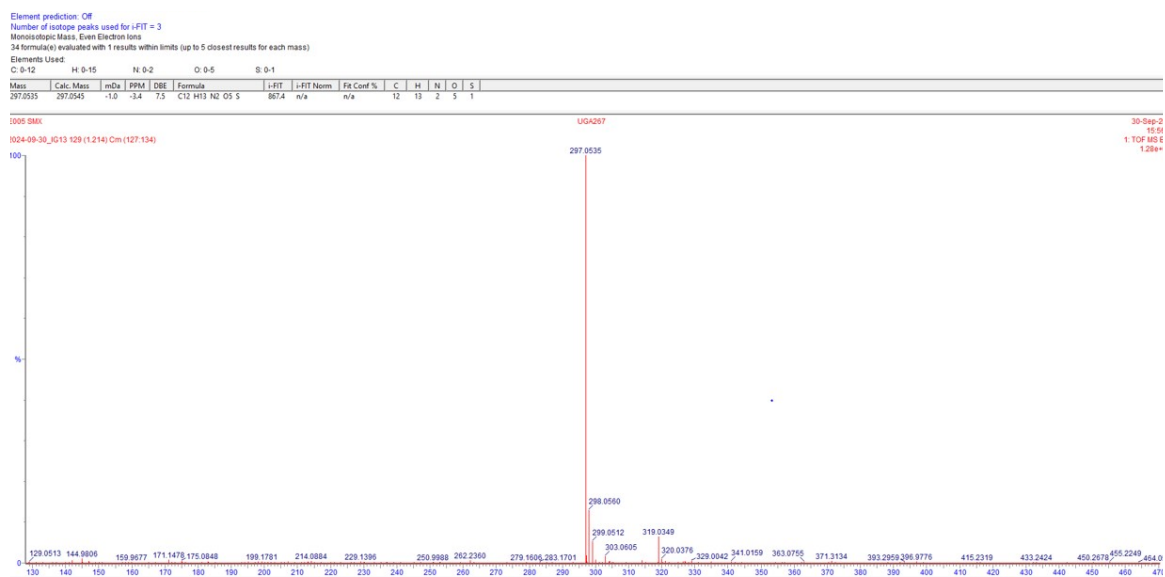

**Figure SM11:** HRMS of compound SMX 015

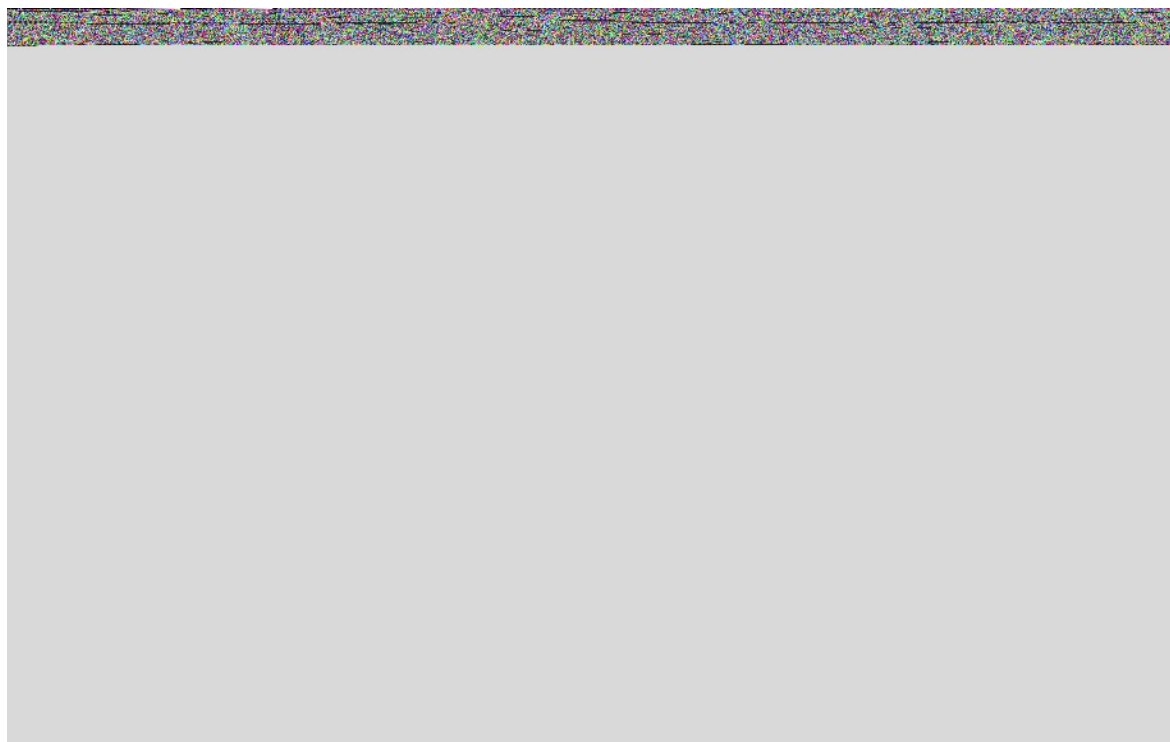

**Figure SM12:** FTIR of compound SMX 015



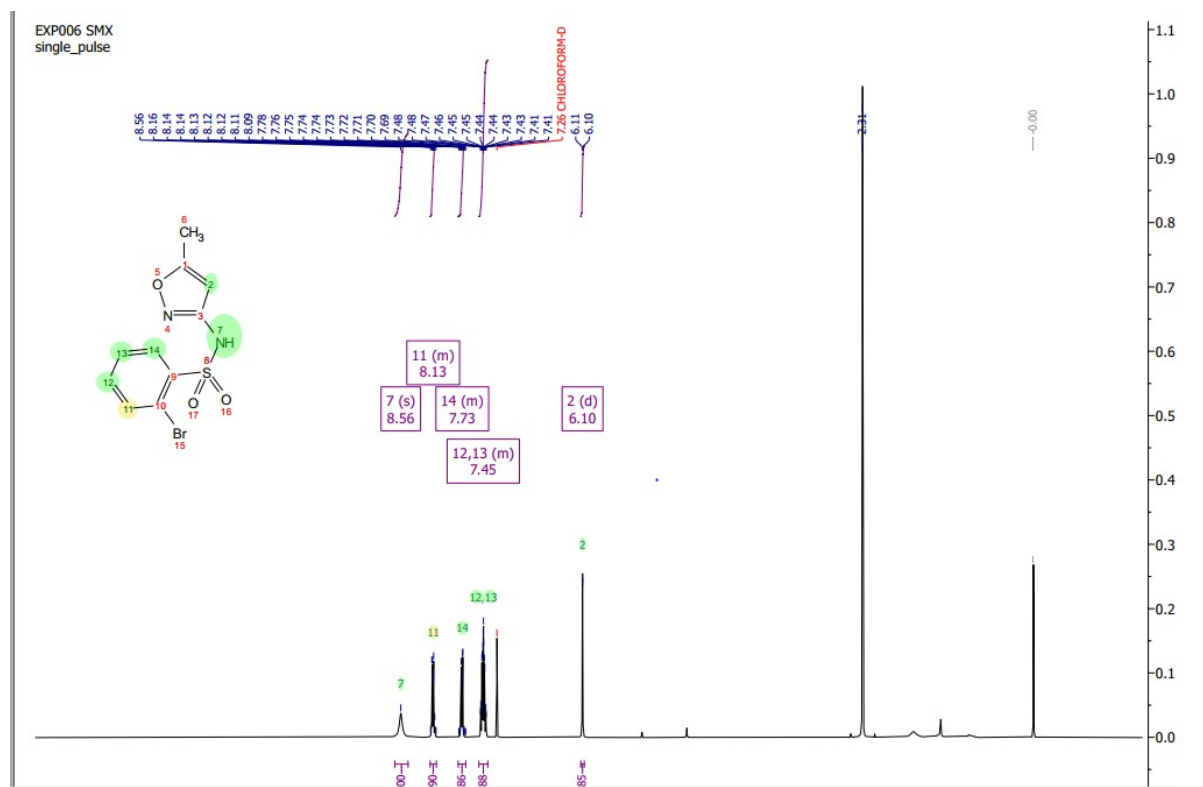

**Figure SM13:**  $^1\text{H}$  NMR spectrum of compound SMX 019

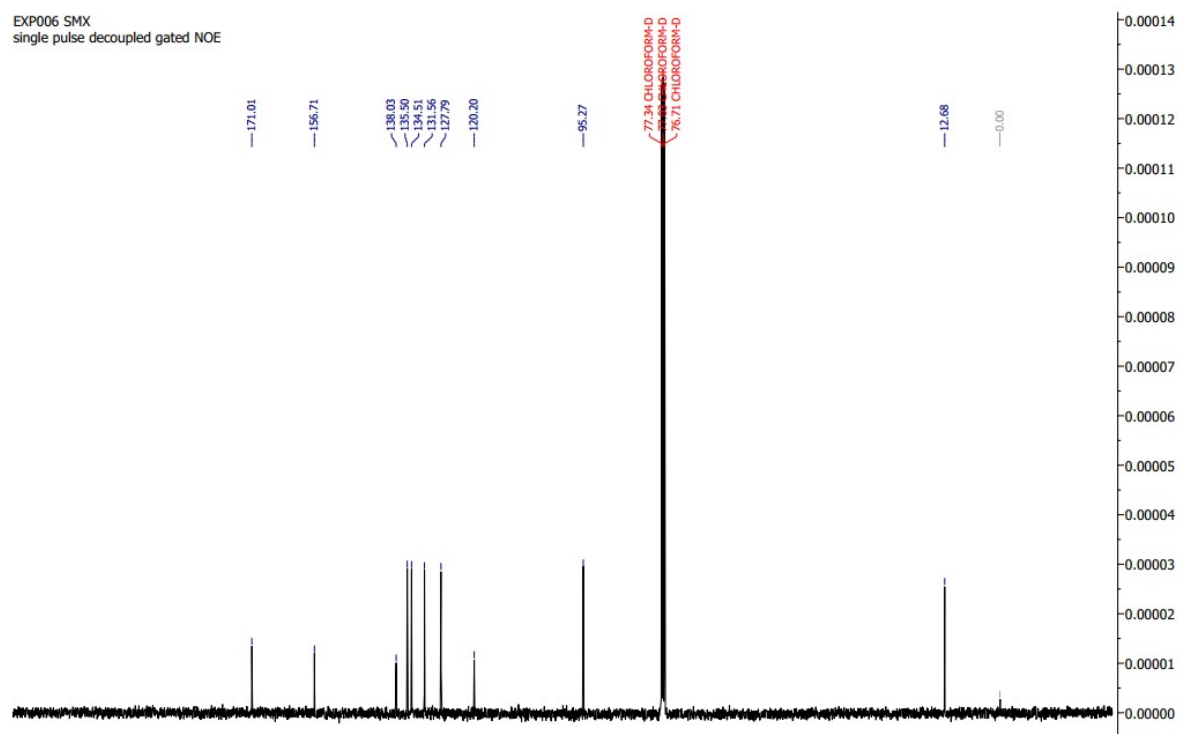

**Figure SM14:**  $^{13}\text{C}$  NMR spectrum of compound SMX 019

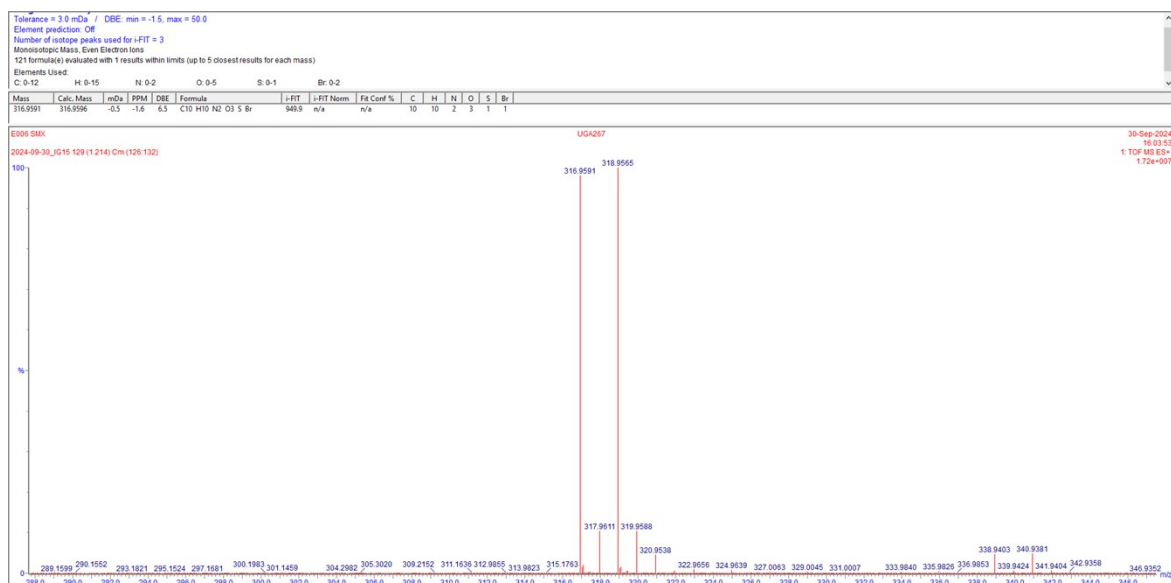

**Figure SM15:** HRMS of compound SMX 019

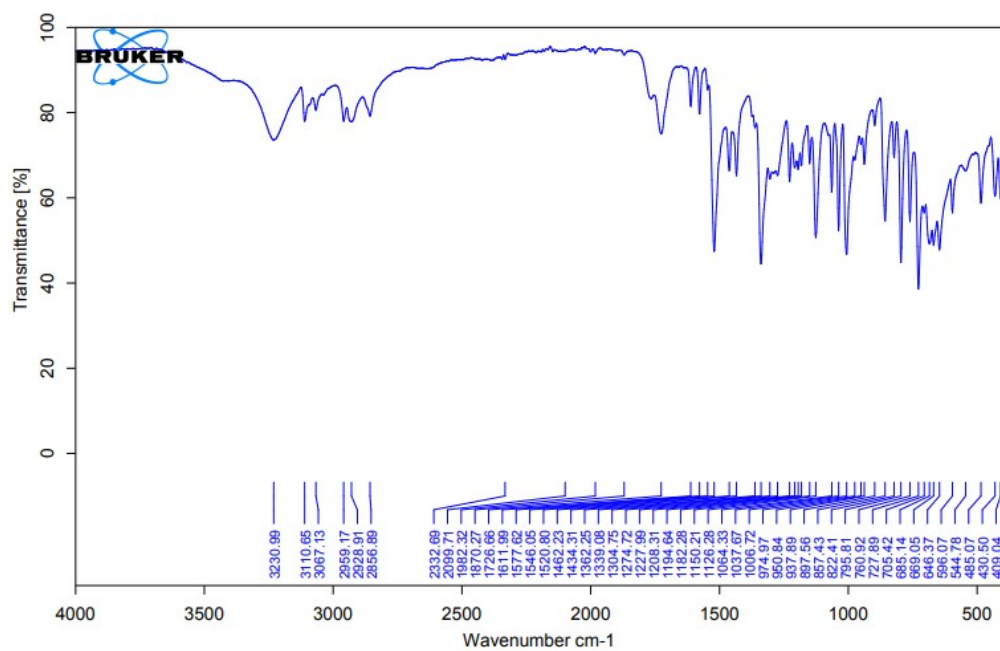

**Figure SM16:** FTIR of compound SMX 019

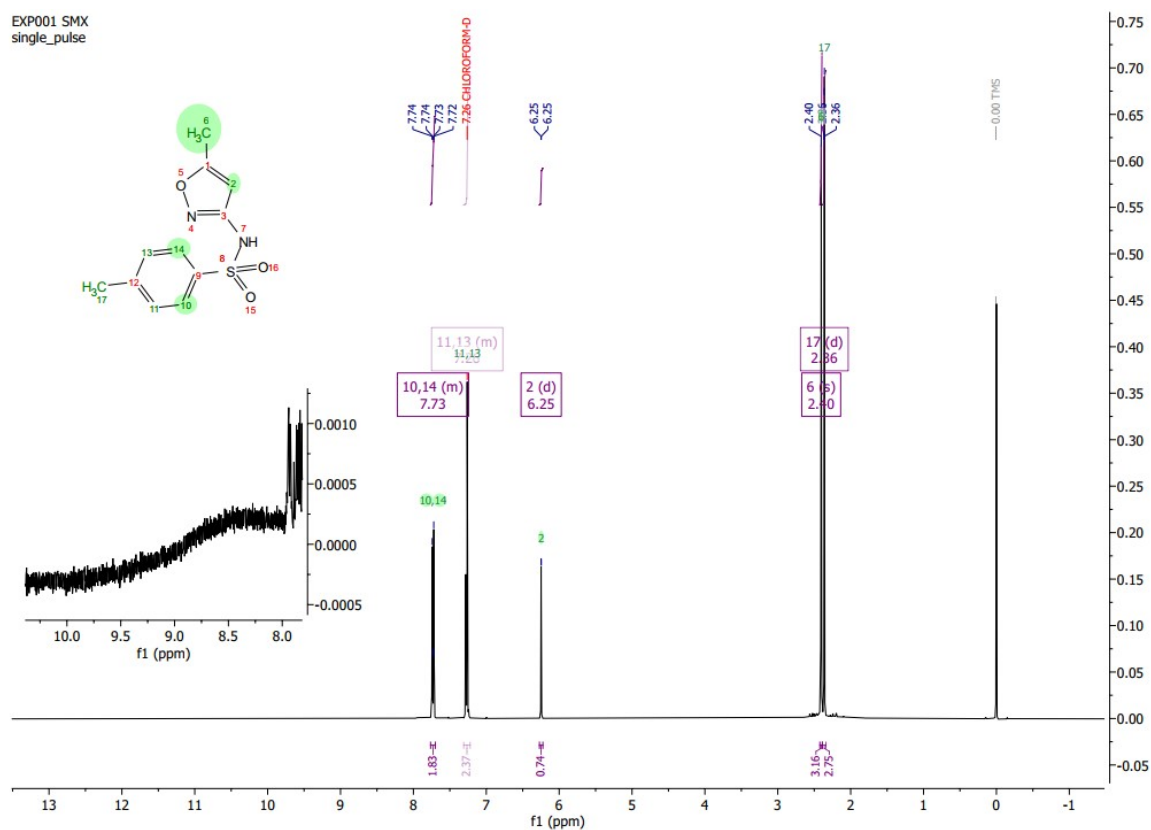

**Figure SM17:** <sup>1</sup>H NMR spectrum of compound SMX 033

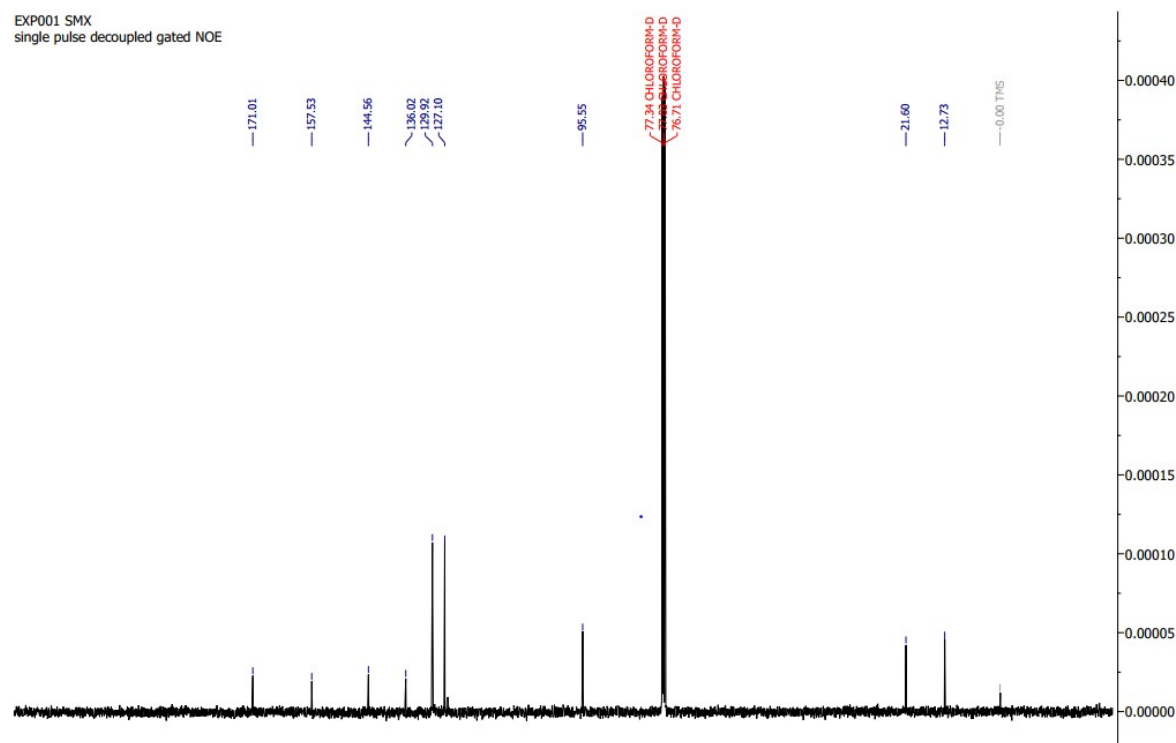

**Figure SM18:** <sup>13</sup>C NMR spectrum of compound SMX 033

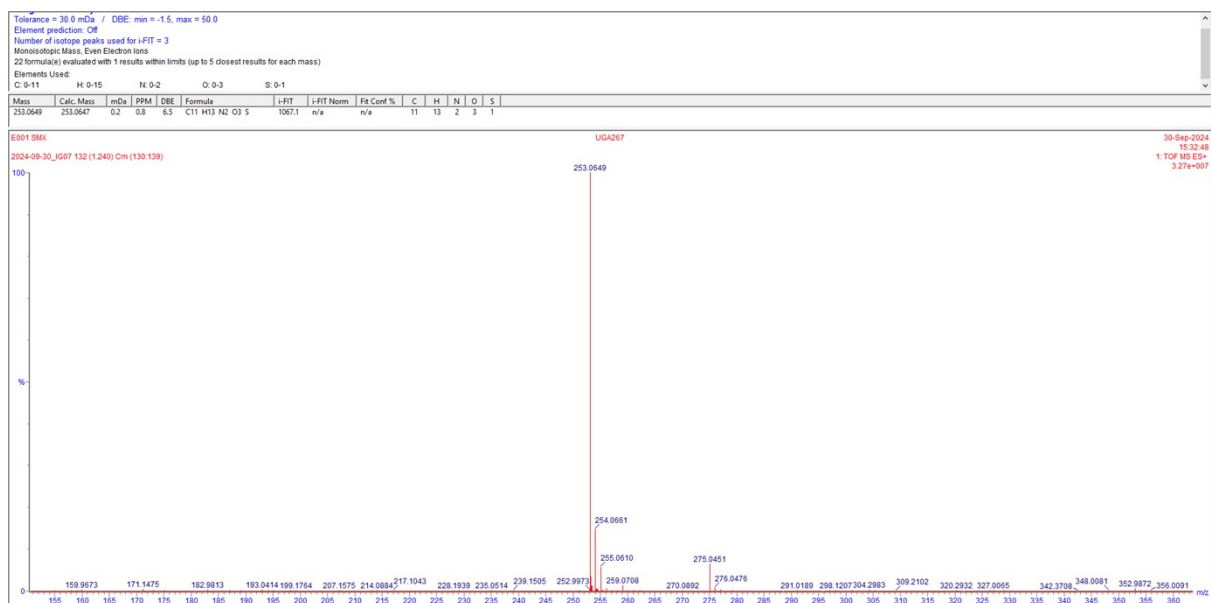

**Figure SM19:** HRMS of compound SMX 033

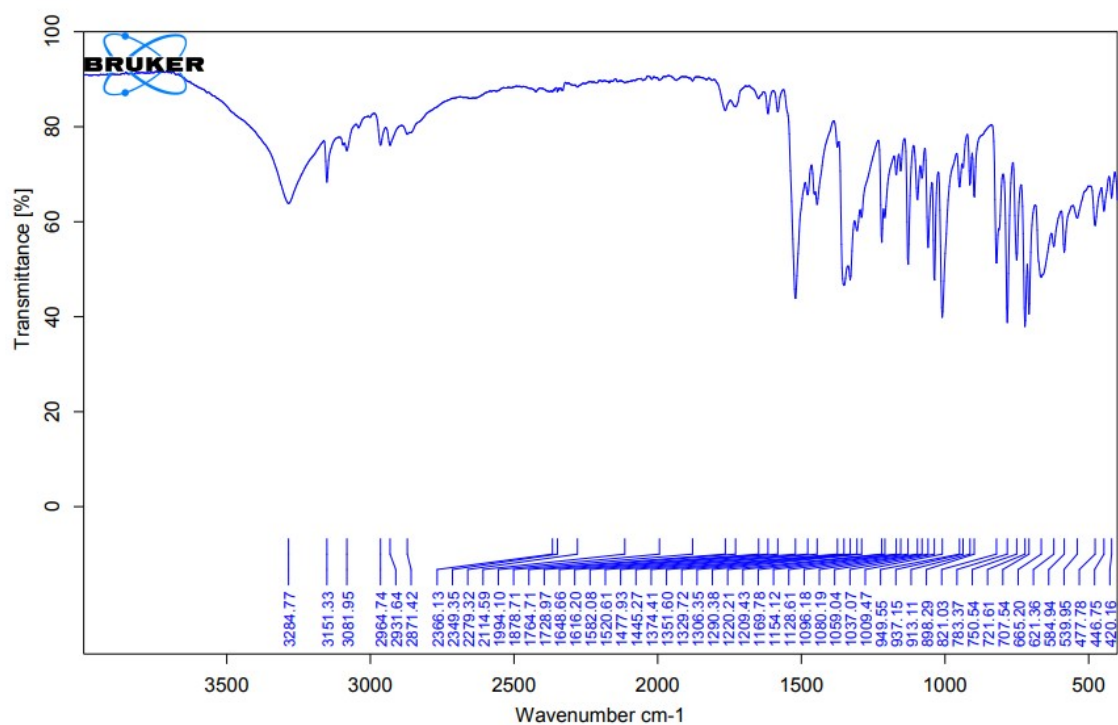

**Figure SM20:** FTIR spectrum of compound SMX 033
